# Supplementary material
Source: PubMed Central journal article supplement (PMC6744979)
Supplement: NIHMS1532813-supplement-1.pdf [file NIHMS1532813-supplement-1.pdf]

# Supplementary Figure S1

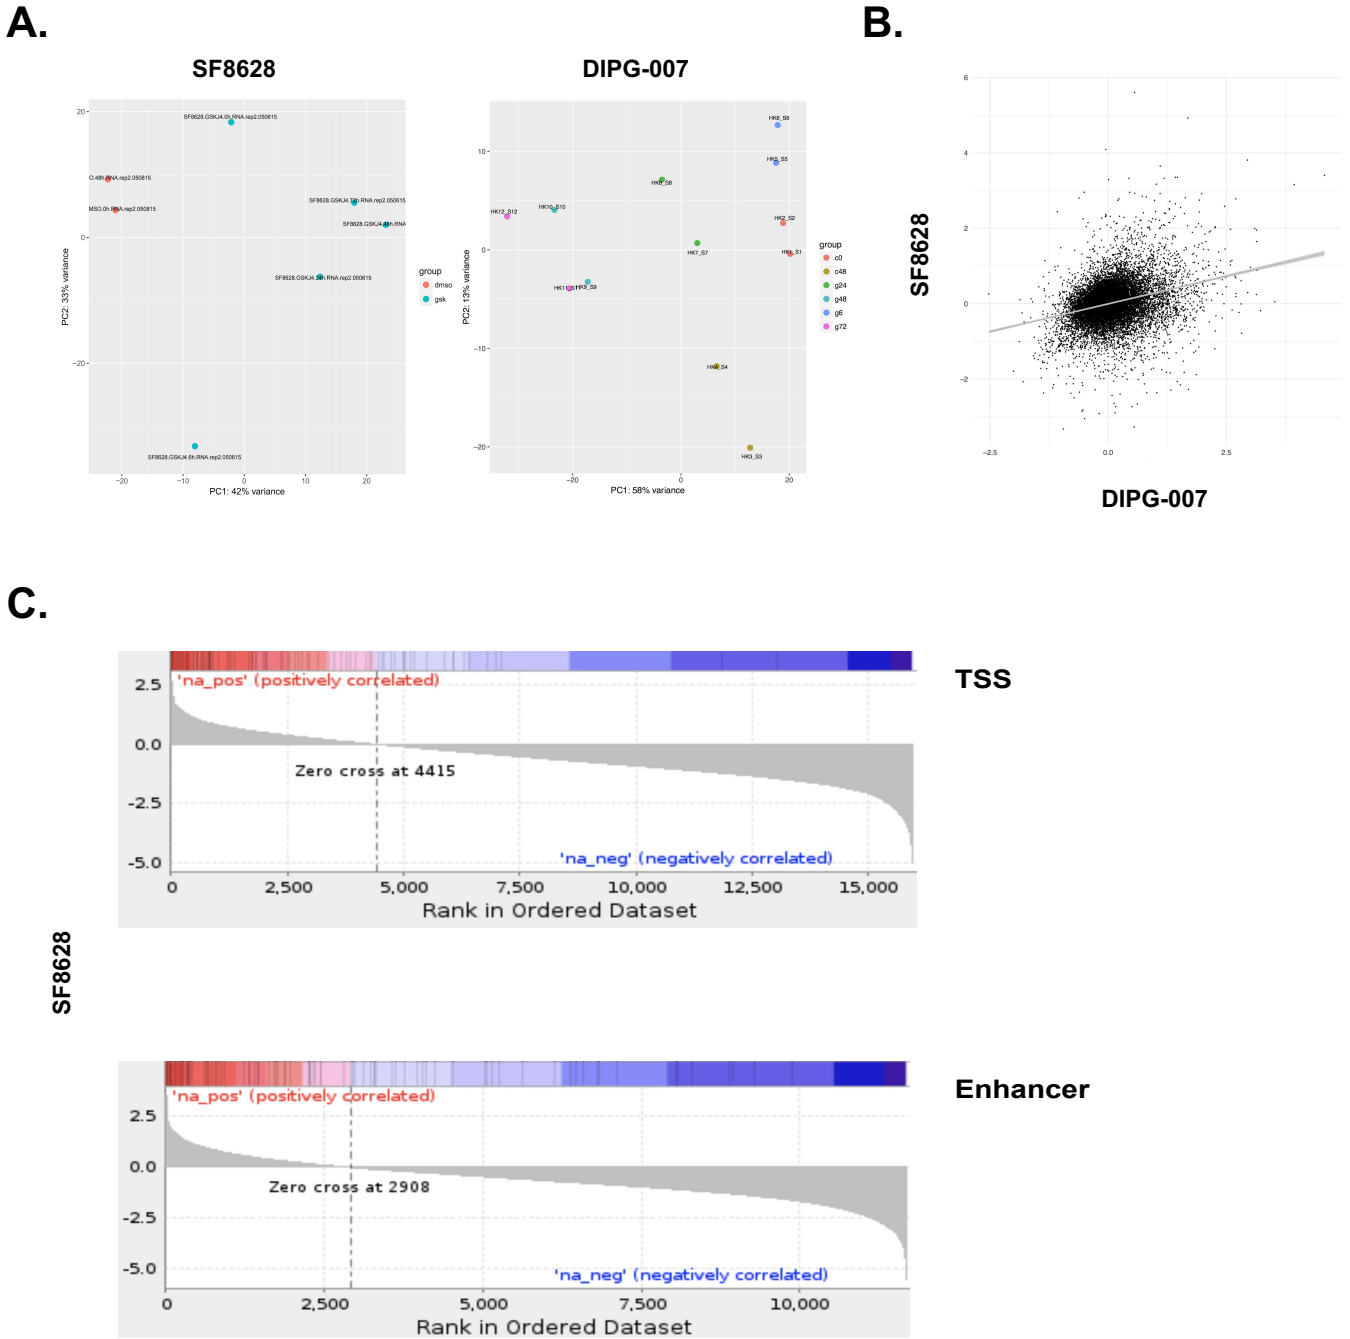

**Supplementary Figure S1. Effects of GSK-J4 on gene expression and DNA binding.** (A) Principle Component Analysis of RNA-Seq data of SF8628 and DIPG-007 cells including DMSO collected at 0 and 48 hours and GSK-J4 treated samples collected at 0, 6, 24, 48, 72 hours following treatment. (B) Scatterplot to show RNA-Seq expression correlation between SF8628 and DIPG-007 cell lines as indicated on the label of X and Y axis. (C) ATAC-Seq signals in SF8628 cells are separated into promoter (< 3kb TSS) and enhancer (or distal intergenic) region and sorted from positive to negative from left to right on X-axis. Y-axis indicates the height of binding peaks.
