# Supplementary material
Source: PubMed Central journal article supplement (PMC6744979)
Supplement: NIHMS1532813-supplement-3.pdf [file NIHMS1532813-supplement-3.pdf]

# Supplementary Figure S3

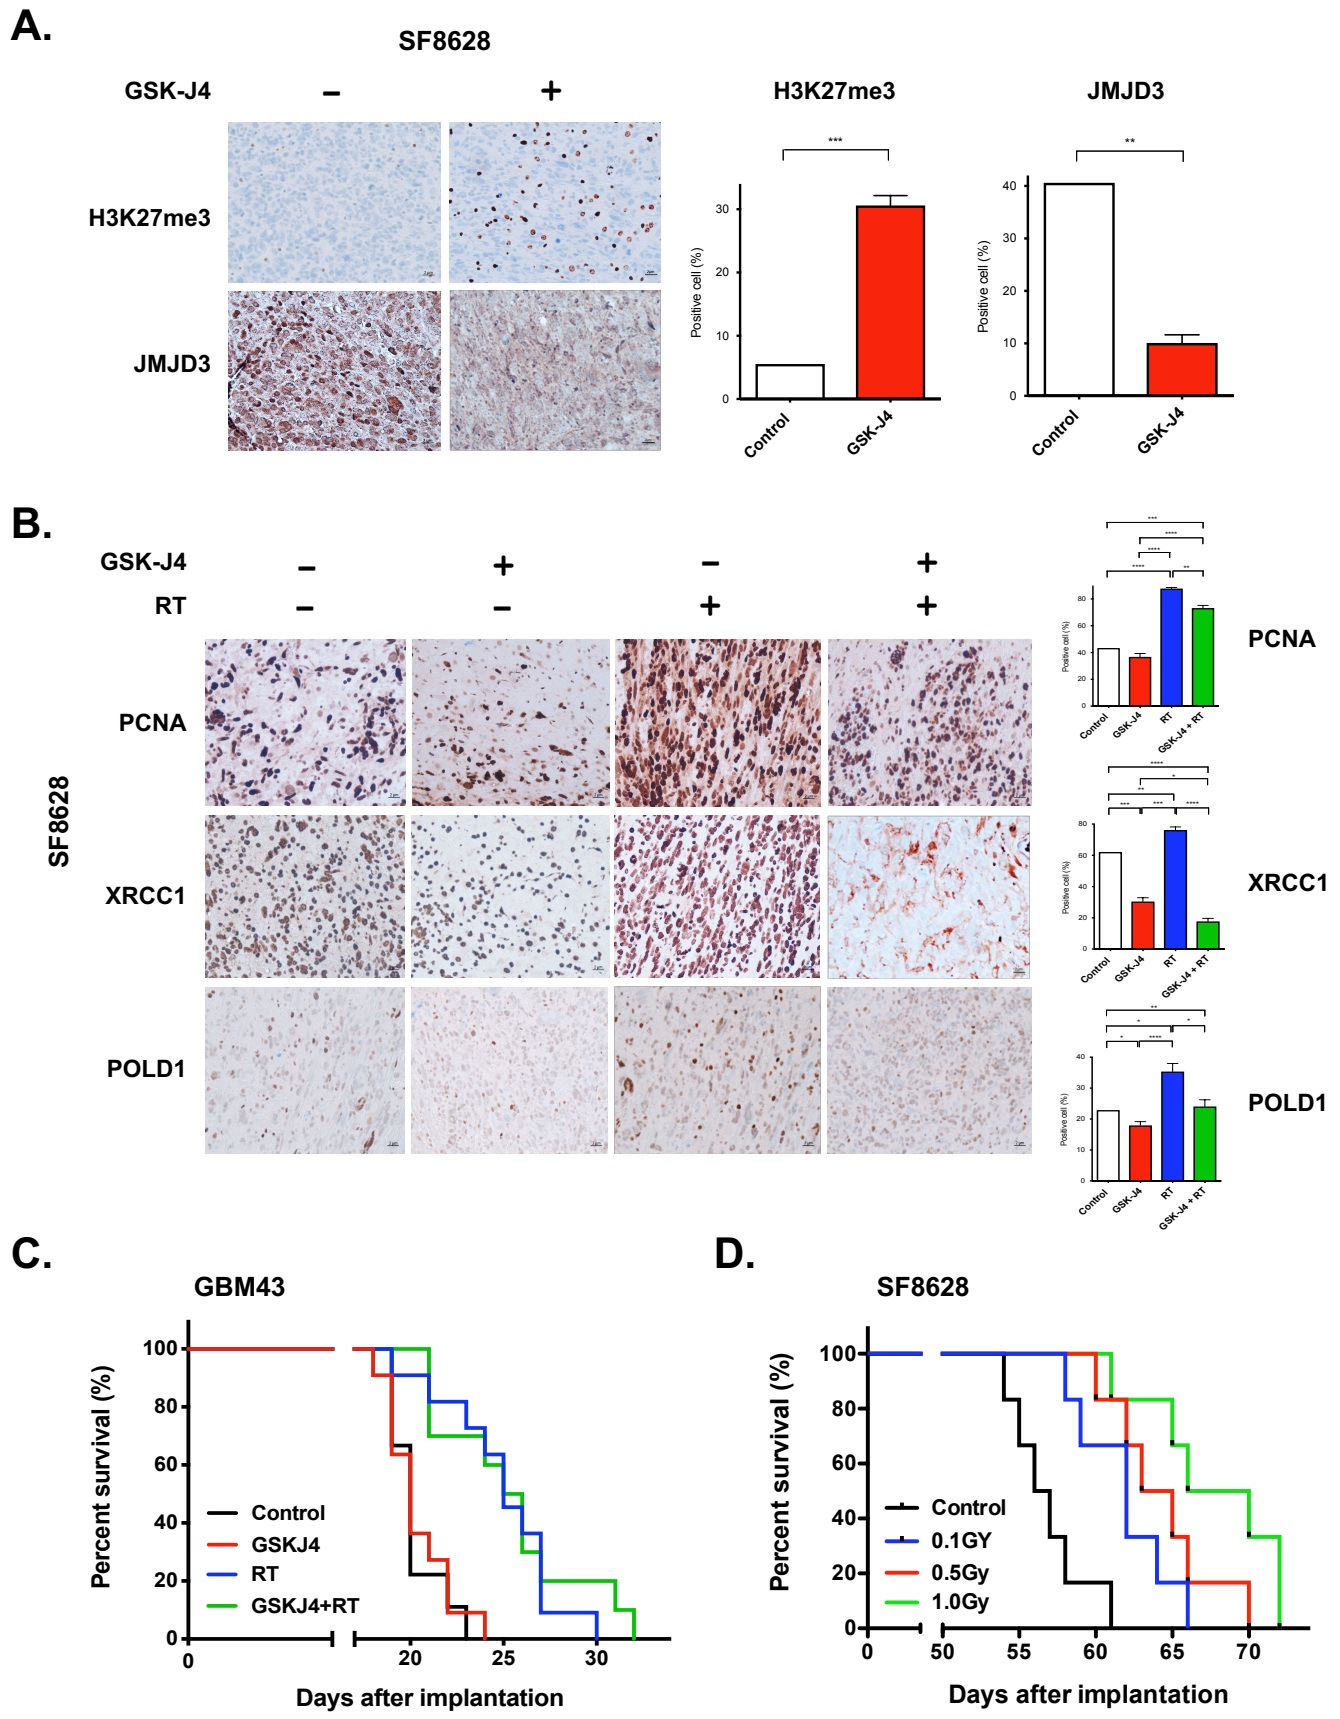

**Supplementary Figure S3. Effects of GSK-J4 on expression of histone modification enzymes and DNA damage repair proteins, and radiation antitumor activity *in vivo*.** **(A)** Effect of GSKJ4 treatment on K27me3 and JMJD3 expression in SF8628 K27M tumor. Left: Image results show GSKJ4 treatment (+) increased tumor cell K27me3 positivity and decrease tumor cells JMJD3 positivity. Right: The graph shows the number of positive cells from vehicle and GSKJ4 treated tumors, with values based on average positive cells counted in three high-powered fields (mean  $\pm$  SEM). Unpaired *t*-test values for comparisons between vehicle and GSKJ4 treatment: K27me3,  $***P = 0.0002$ ; JMJD3,  $**P = 0.0022$ . **(B)** Effect of GSKJ4 treatment on expression of DNA damage repair proteins. Left: Images of representative PCNA, XRCC1, and POLD1 staining for intracranial tumor from mice euthanized at the end of treatment. Right: Mean and SD values representing the average number of positive cells in four high-powered fields in each tumor. Unpaired *t*-test values for comparisons between treatments. :  $****P < 0.0001$ ; PCNA,  $***P = 0.0004$  between control vs. GSK-J4 + RT,  $***P = 0.0003$  for between GSK-J4 vs. GSK-J4 + RT; XRCC1,  $***P = 0.0004$  between control vs. GSK-J4,  $**p = 0.0046$  between control vs. RT,  $***P = 0.0001$  between GSK-J4 vs. RT,  $*P = 0.00149$  between GSK-J4 vs. GSK-J4 + RT; POLD1,  $*P = 0.0253$  between control vs. GSK-J4;  $*P = 0.0102$  between control vs. RT;  $**P = 0.0038$  between control vs. GSK-J4 + RT;  $*P = 0.0291$  between RT vs. GSK-J4 + RT. **(C)** Survival plots for GBM43 xenografts. Statistical analysis was performed using a log-rank test with Holm adjustment.,  $**P = 0.0003$  between control vs. RT,  $***P = 0.0002$  between control vs. GSK-J4 + RT,  $**P = 0.0005$  between GSK-J4 vs. GSK-J4 + RT. There is no significance different between control vs. GSK-J4 and RT vs. GSK-J4 + RT. **(D)** Analysis of intracranial DIPG radiation dose response. Animals receiving intracranial implantation with SF8628 cells ( $1.0 \times 10^5$ ) were irradiated with 0.1, 0.5, or 1.0 Gy per day for 3 days a week for 2 weeks. Radiation efficacy was assessed by survival benefit to animals. Statistical analysis was performed using a log-rank test with Holm adjustment.,  $*P = 0.0061$  between control vs. 0.1 Gy,  $**P = 0.0016$  between control vs. 0.5 Gy,  $**P = 0.0012$  between control vs. 1.0 Gy.
