# Supplementary material
Source: PubMed Central journal article supplement (PMC6744979)
Supplement: NIHMS1532813-supplement-4.pdf [file NIHMS1532813-supplement-4.pdf]

# Supplementary Table S2

| Rank | Motif | P-value | log P-value | % of Targets | % of Background | STD(Bg STD)         | Best Match/Details                                                                                                                 | Motif File                          |
|------|-------|---------|-------------|--------------|-----------------|---------------------|------------------------------------------------------------------------------------------------------------------------------------|-------------------------------------|
| 1    |       | 1e-453  | -1.044e+03  | 14.34%       | 1.06%           | 1854.4bp (1561.4bp) | Rbpj1(?)/Panc1-Rbpj1-ChIP-Seq(GSE47459)/Homer(0.594)<br><a href="#">More Information</a>   <a href="#">Similar Motifs Found</a>    | <a href="#">motif file (matrix)</a> |
| 2    |       | 1e-446  | -1.028e+03  | 15.43%       | 1.34%           | 1834.3bp (1826.2bp) | Zfp809(Zf)/ES-Zfp809-ChIP-Seq(GSE70799)/Homer(0.695)<br><a href="#">More Information</a>   <a href="#">Similar Motifs Found</a>    | <a href="#">motif file (matrix)</a> |
| 3    |       | 1e-434  | -1.000e+03  | 15.77%       | 1.49%           | 2028.7bp (1760.9bp) | POL13.1_MED-1/Jaspar(0.598)<br><a href="#">More Information</a>   <a href="#">Similar Motifs Found</a>                             | <a href="#">motif file (matrix)</a> |
| 4    |       | 1e-424  | -9.770e+02  | 15.48%       | 1.47%           | 2145.5bp (1804.5bp) | THAP1/MA0597.1/Jaspar(0.618)<br><a href="#">More Information</a>   <a href="#">Similar Motifs Found</a>                            | <a href="#">motif file (matrix)</a> |
| 5    |       | 1e-423  | -9.749e+02  | 15.60%       | 1.51%           | 2631.0bp (1480.5bp) | NFATC2/MA0152.1/Jaspar(0.720)<br><a href="#">More Information</a>   <a href="#">Similar Motifs Found</a>                           | <a href="#">motif file (matrix)</a> |
| 6    |       | 1e-420  | -9.673e+02  | 12.46%       | 0.80%           | 1815.4bp (1483.2bp) | POU6F2/MA0793.1/Jaspar(0.650)<br><a href="#">More Information</a>   <a href="#">Similar Motifs Found</a>                           | <a href="#">motif file (matrix)</a> |
| 7    |       | 1e-387  | -8.926e+02  | 13.57%       | 1.19%           | 3237.1bp (1360.4bp) | MF0010.1_Homeobox_class/Jaspar(0.658)<br><a href="#">More Information</a>   <a href="#">Similar Motifs Found</a>                   | <a href="#">motif file (matrix)</a> |
| 8    |       | 1e-381  | -8.781e+02  | 12.68%       | 1.02%           | 2131.7bp (1258.3bp) | PH0086.1_Irx5/Jaspar(0.733)<br><a href="#">More Information</a>   <a href="#">Similar Motifs Found</a>                             | <a href="#">motif file (matrix)</a> |
| 9    |       | 1e-379  | -8.741e+02  | 13.69%       | 1.27%           | 2588.1bp (1390.6bp) | PB0148.1_Mtf1_2/Jaspar(0.725)<br><a href="#">More Information</a>   <a href="#">Similar Motifs Found</a>                           | <a href="#">motif file (matrix)</a> |
| 10   |       | 1e-372  | -8.582e+02  | 15.55%       | 1.83%           | 3538.5bp (1499.7bp) | SCRT1/MA0743.1/Jaspar(0.680)<br><a href="#">More Information</a>   <a href="#">Similar Motifs Found</a>                            | <a href="#">motif file (matrix)</a> |
| 11   |       | 1e-369  | -8.498e+02  | 12.17%       | 0.96%           | 1995.6bp (1329.5bp) | Pix1/MA0682.1/Jaspar(0.788)<br><a href="#">More Information</a>   <a href="#">Similar Motifs Found</a>                             | <a href="#">motif file (matrix)</a> |
| 12   |       | 1e-323  | -7.446e+02  | 12.56%       | 1.31%           | 1883.8bp (1746.9bp) | GLIS2/MA0736.1/Jaspar(0.669)<br><a href="#">More Information</a>   <a href="#">Similar Motifs Found</a>                            | <a href="#">motif file (matrix)</a> |
| 13   |       | 1e-321  | -7.397e+02  | 15.86%       | 2.35%           | 3420.5bp (1719.0bp) | PB0110.1_Bcl6b_2/Jaspar(0.713)<br><a href="#">More Information</a>   <a href="#">Similar Motifs Found</a>                          | <a href="#">motif file (matrix)</a> |
| 14   |       | 1e-316  | -7.296e+02  | 13.04%       | 1.48%           | 2725.4bp (1607.0bp) | Smad4(MAD)/ESC-SMAD4-ChIP-Seq(GSE29422)/Homer(0.672)<br><a href="#">More Information</a>   <a href="#">Similar Motifs Found</a>    | <a href="#">motif file (matrix)</a> |
| 15   |       | 1e-315  | -7.262e+02  | 12.92%       | 1.46%           | 2563.9bp (1706.4bp) | PB0117.1_Eomes_2/Jaspar(0.638)<br><a href="#">More Information</a>   <a href="#">Similar Motifs Found</a>                          | <a href="#">motif file (matrix)</a> |
| 16   |       | 1e-305  | -7.025e+02  | 11.07%       | 1.02%           | 2193.8bp (1268.3bp) | BARHL2/MA0635.1/Jaspar(0.683)<br><a href="#">More Information</a>   <a href="#">Similar Motifs Found</a>                           | <a href="#">motif file (matrix)</a> |
| 17   |       | 1e-280  | -6.453e+02  | 13.09%       | 1.78%           | 1602.4bp (1573.2bp) | PB0098.1_Zfp410_1/Jaspar(0.719)<br><a href="#">More Information</a>   <a href="#">Similar Motifs Found</a>                         | <a href="#">motif file (matrix)</a> |
| 18   |       | 1e-193  | -4.461e+02  | 14.13%       | 3.21%           | 2815.4bp (1482.0bp) | BHLHE23/MA0817.1/Jaspar(0.774)<br><a href="#">More Information</a>   <a href="#">Similar Motifs Found</a>                          | <a href="#">motif file (matrix)</a> |
| 19   |       | 1e-119  | -2.755e+02  | 1.25%        | 0.00%           | 13752.1bp (577.1bp) | TEAD3(TEA)/HepG2-TEAD3-ChIP-Seq(Encode)/Homer(0.645)<br><a href="#">More Information</a>   <a href="#">Similar Motifs Found</a>    | <a href="#">motif file (matrix)</a> |
| 20   |       | 1e-87   | -2.025e+02  | 20.44%       | 10.01%          | 4642.6bp (1734.6bp) | ZKSCAN1(Zf)/HepG2-ZKSCAN1-ChIP-Seq(Encode)/Homer(0.734)<br><a href="#">More Information</a>   <a href="#">Similar Motifs Found</a> | <a href="#">motif file (matrix)</a> |
| 21   |       | 1e-70   | -1.624e+02  | 25.12%       | 14.55%          | 6496.3bp (1690.8bp) | Zac1(Zf)/Neuro2A-Plagl1-ChIP-Seq(GSE75942)/Homer(0.681)<br><a href="#">More Information</a>   <a href="#">Similar Motifs Found</a> | <a href="#">motif file (matrix)</a> |
| 22   |       | 1e-40   | -9.336e+01  | 32.59%       | 23.42%          | 5216.4bp (1947.8bp) | PB0025.1_Glis2_1/Jaspar(0.947)<br><a href="#">More Information</a>   <a href="#">Similar Motifs Found</a>                          | <a href="#">motif file (matrix)</a> |
| 23   |       | 1e-26   | -6.112e+01  | 32.04%       | 24.62%          | 5426.4bp (1809.7bp) | HIC1(Zf)/Treg-ZBTB29-ChIP-Seq(GSE99889)/Homer(0.669)<br><a href="#">More Information</a>   <a href="#">Similar Motifs Found</a>    | <a href="#">motif file (matrix)</a> |
| 24   |       | 1e-18   | -4.226e+01  | 22.97%       | 17.55%          | 6302.5bp (1574.6bp) | JUN/MA0488.1/Jaspar(0.634)<br><a href="#">More Information</a>   <a href="#">Similar Motifs Found</a>                              | <a href="#">motif file (matrix)</a> |

**Supplementary Table S2. The motifs enriched among ATAC-Seq binding sites down-regulated by GSK-J4 in K27M DIPG cells.**
