# Supplementary material
Source: PubMed Central journal article supplement (PMC6744979)
Supplement: NIHMS1532813-supplement-5.pdf [file NIHMS1532813-supplement-5.pdf]

# Supplementary Table S1

## Differential Expression upon GSK-J4 treatment

| Gene   | RNA-seq           | ATAC-seq          |
|--------|-------------------|-------------------|
|        | Log2 FC* / Stat*  | Log2 FC / Stat    |
| LIG1   | -0.7335 / -3.1494 | -0.2854 / -0.7659 |
| DMC1   | -0.7134 / -0.9468 | -0.4972 / -0.5645 |
| MSH4   | -0.6510 / -1.0018 | -0.5402 / -1.2388 |
| FANCA  | -0.5576 / -2.1875 | -1.5827 / -3.0546 |
| FANCG  | -0.5531 / -2.5230 | -0.2621 / -0.9983 |
| POLD1  | -0.5492 / -3.6662 | -1.7099 / -2.8479 |
| RAD54L | -0.5419 / -2.5490 | -0.7155 / -1.0593 |
| PCNA   | -0.5215 / -2.0882 | -0.4613 / -1.6271 |
| XRCC1  | -0.4309 / -1.8287 | -0.4825 / -1.4108 |
| POLQ   | -0.3675 / -1.6241 | -0.2023 / -0.5005 |
| MMS19  | -0.3559 / -1.4067 | -0.3788 / -0.8727 |
| LIG3   | -0.3496 / -1.8751 | -0.7693 / -0.9833 |
| BRCA1  | -0.3320 / -1.2953 | -0.3929 / -1.3575 |
| CHEK1  | -0.3240 / -1.5008 | -0.1883 / -0.6352 |
| PNKP   | -0.3179 / -1.7209 | -0.6061 / -1.9871 |
| RAD52  | -0.3159 / -1.5480 | -0.4244 / -1.3969 |
| XRCC2  | -0.2650 / -0.9931 | -0.5767 / -1.9135 |
| POLH   | -0.2377 / -1.2090 | -0.5921 / -1.7628 |

**Supplementary Table S1. Effect of GSK-J4 treatment on genes associated with DNA double strand break repair in K27M DIPG cells.**

\*Log2 FC: log 2 fold change

\*Stat: Log2 FC corrected by standard deviation
